# Supplementary material for: A multifunctional skin-like wearable optical sensor based on an optical micro-/nanofibre
Source: Royal Society of Chemistry journal article supplement (doi:10.1039/d0nr03446k), 2020-01-01
Supplement: d0nr03446k1.pdf [file d0nr03446k1.pdf]

Supplementary Information for

**Multifunctional Skin-like Wearable Optical Sensor Based on Optical  
Micro/nanofibre**

Jing Pan,<sup>a</sup> Zhang Zhang,<sup>a</sup> Chengpeng Jiang,<sup>b</sup> Lei Zhang \*<sup>a b</sup> and Limin Tong\*<sup>a</sup>

<sup>a</sup>State Key Laboratory of Modern Optical Instrumentation, College of Optical Science and  
Engineering, Zhejiang University, Hangzhou, 310027

<sup>b</sup>Research Center for Intelligent Sensing, Zhejiang Lab, Hangzhou 311121

E-mail: zhang\_lei@zju.edu.cn; phytong@zju.edu.cn

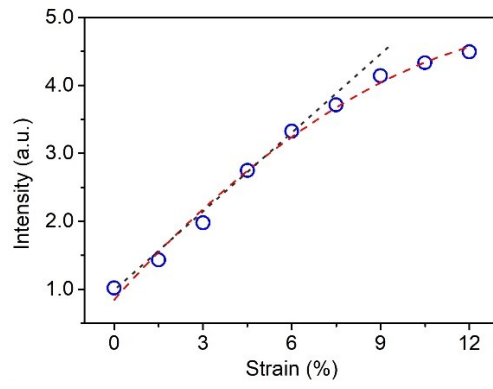

**Fig. S1** Optical intensity under various strains in the range of 0 to 12.5%.

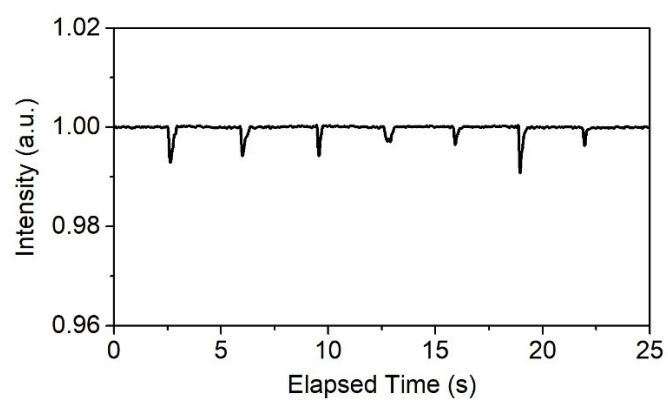

**Fig. S2** Dynamic response of a SLWOS to body temperature and skin movement.
